# Supplementary material for: Enhanced Transmissibility and Decreased Virulence of HIV-1 CRF07_BC May Explain Its Rapid Expansion in China
Source: PubMed Central journal article supplement (PMC9431131; doi:10.1128/spectrum.00146-22), 2022-06-21
Supplement: spectrum.00146-22-s0001.pdf [file spectrum.00146-22-s0001.pdf]

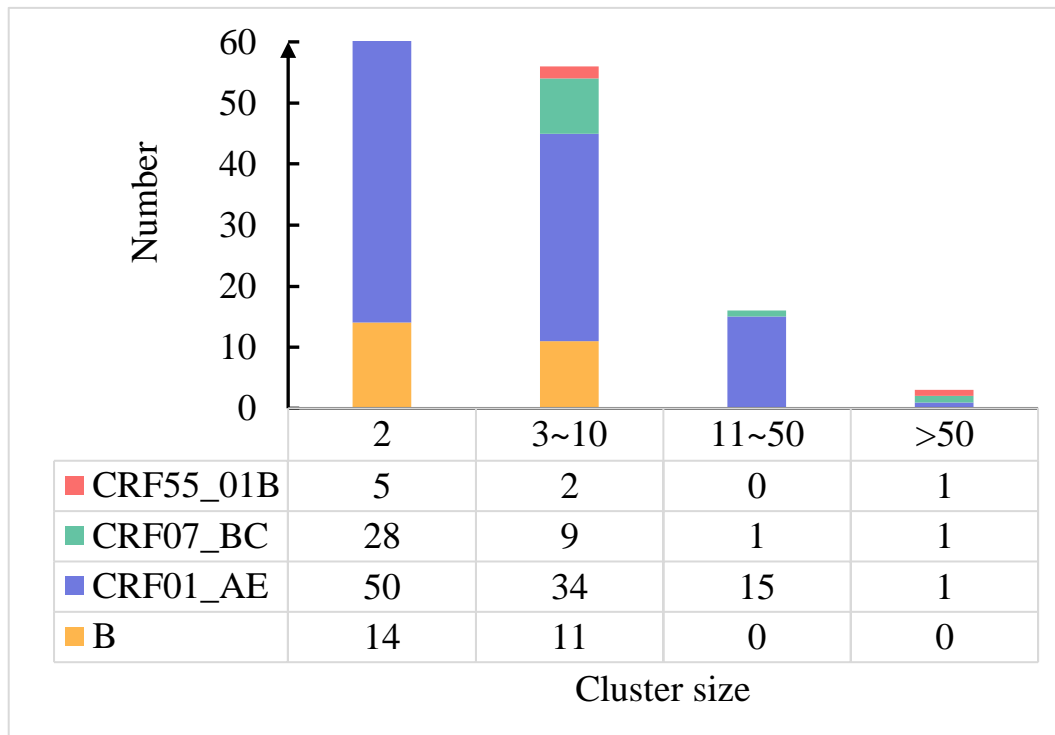

Figure S1 The distribution of cluster size in Guangzhou, China.

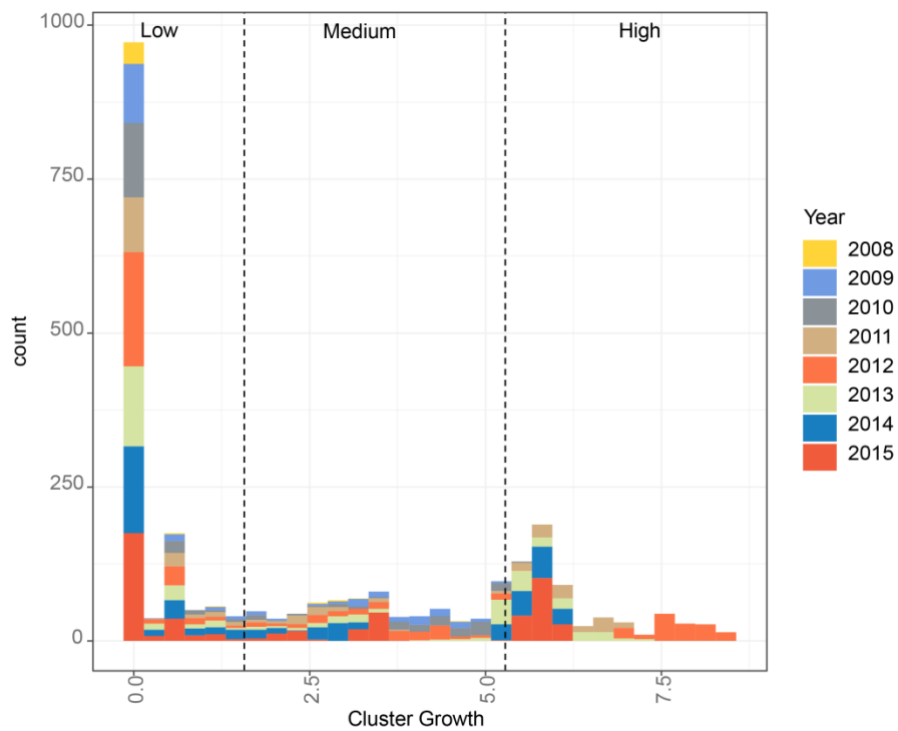

Figure S2 The distribution of cluster growth of each HIV-infected individual diagnosed during 2009 to 2015 in Guangzhou, China

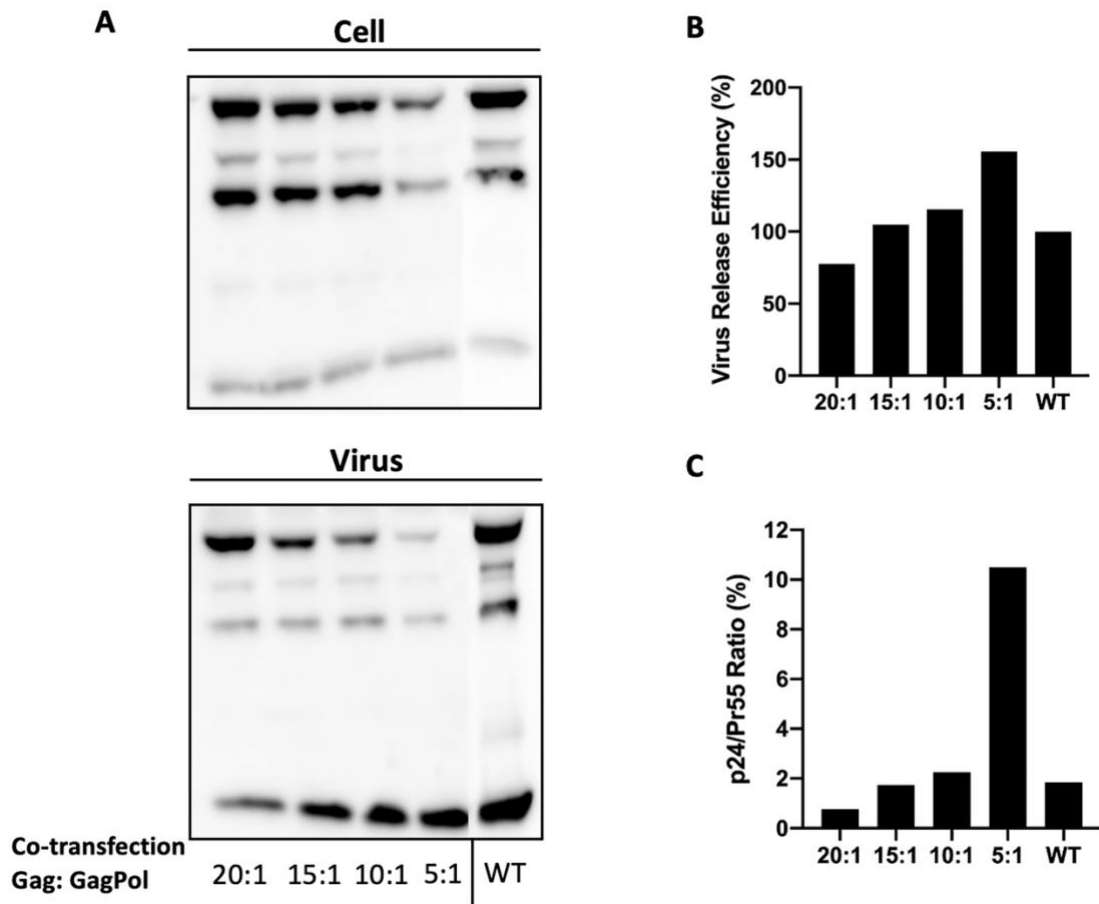

Figure S3 Virus release and Gag processing generated at different co-transfection ratios of Gag- and GagPol-expressing plasmids. **(A)** 293T cells were transfected with HIV-1 pNL4-3 clone (WT) or co-transfected with HIV-1 proviral clones that encode Gag and GagPol at a ratio of 20:1, 15:1, 10:1 or 5:1. Two days post-transfection, virus and cell lysates were harvested and measured by WB. Virus release efficiency **(B)** and Gag processing **(C)** were analyzed as described in Figure 3. The virus release of WT was set as 100%. Data was obtained from one experiment.

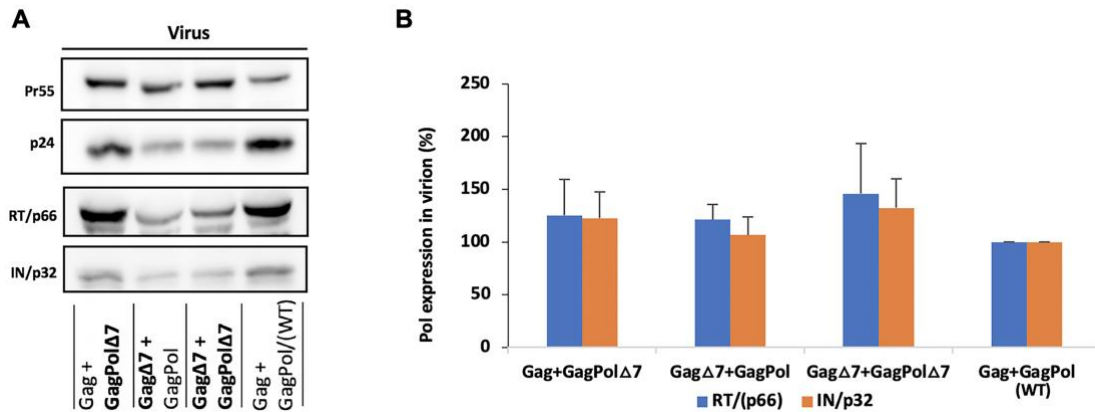

Figure S4 The role of the seven-amino-acid deletion in p6<sup>Gag</sup> and the overlapping deletion p6\* in packaging of Pol products. (A) A gel run of Western blotting. 293T cells were co-transfected with HIV-1 proviral clones that encode Gag and GagPol at a ratio of 15:1. Two days post-transfection, virus and cell lysates were harvested and subjected to Western blotting detecting Gag and Pol products. Panel A is part of Figure 5 in which did not shown the Pol products. (B) Quantitative analysis of Pol products in Western blotting. The level of RT(p66) and IN(p32) in virion were quantified and normalized to the level of virion-associated Gag (Pr55+p24), respectively. The WT, generated from co-transfection of WT Gag plus WT GagPol, was set equal to 100%. Standard deviation was obtained from more than three independent experiments.

**Table S1 Factors associated with the growth index of HIV-1 transmission clusters among MSM using overall models.**

| Characteristics           | cluster growth $\geq 1.57$ |          | cluster growth $\geq 5.28$ |          |
|---------------------------|----------------------------|----------|----------------------------|----------|
|                           | OR (95%CI)                 | <i>P</i> | OR (95%CI)                 | <i>P</i> |
| Age group                 |                            |          |                            |          |
| below 20                  | 1.080 (0.617, 1.892)       | 0.788    | 1.323 (0.675, 2.591)       | 0.323    |
| 21~30                     | ref                        |          | ref                        |          |
| 31~40                     | 0.896 (0.648, 1.240)       | 0.509    | 0.956 (0.655, 1.394)       | 0.779    |
| 41~                       | 0.573 (0.353, 0.929)       | 0.024    | 0.747 (0.445, 1.256)       | 0.186    |
| Marital status            |                            |          |                            |          |
| Unmarried                 | ref                        |          | ref                        |          |
| Married                   | 1.323 (0.885, 1.978)       | 0.172    | 1.239 (0.793, 1.937)       | 0.199    |
| Divorced                  | 1.764 (0.920, 3.383)       | 0.087    | 1.537 (0.756, 3.126)       | 0.251    |
| Not disclosed             | 1.259 (0.569, 2.786)       | 0.570    | 0.612 (0.210, 1.780)       | 0.540    |
| Education level           |                            |          |                            |          |
| Primary or below          | ref                        |          | ref                        |          |
| Junior or High            | 1.140 (0.530, 2.450)       | 0.737    | 1.020 (0.550, 1.893)       | 0.728    |
| College or Others         | 1.096 (0.498, 2.412)       | 0.820    | 1.056 (0.539, 2.068)       | 0.975    |
| Not disclosed             | 1.417 (0.432, 4.652)       | 0.566    | 0.228 (0.062, 0.842)       | 0.612    |
| Occupation                |                            |          |                            |          |
| Unskilled work            | ref                        |          | ref                        |          |
| Skilled/Professional work | 1.945 (1.225, 3.089)       | 0.005    | 1.200 (0.688, 2.092)       | 0.157    |
| Students                  | 1.217 (0.702, 2.109)       | 0.484    | 1.018 (0.513, 2.019)       | 0.436    |
| Unemployment              | 0.852 (0.517, 1.406)       | 0.532    | 1.014 (0.629, 1.634)       | 0.141    |
| Not disclosed             | 1.060 (0.770, 1.458)       | 0.721    | 1.225 (0.828, 1.813)       | 0.936    |
| Genotypes                 |                            |          |                            |          |
| B                         | 0.068 (0.021, 0.216)       | <0.001   | -                          | -        |

|           |                         |        |                      |        |
|-----------|-------------------------|--------|----------------------|--------|
| CRF01_AE  | ref                     |        | -                    | -      |
| CRF07_BC  | 25.195 (18.863, 33.654) | <0.001 | ref                  |        |
| CRF55_01B | 26.119 (17.222, 39.611) | <0.001 | 0.014 (0.008, 0.024) | <0.001 |

---

**Table S2 Factors associated with the growth index of HIV-1 transmission clusters among MSM using stepwise models.**

| Characteristics           | cluster growth $\geq 1.57$ |          | cluster growth $\geq 5.28$ |          |
|---------------------------|----------------------------|----------|----------------------------|----------|
|                           | OR (95% CI)                | <i>P</i> | OR (95% CI)                | <i>P</i> |
| Education level           |                            |          |                            |          |
| Primary or below          | -                          | -        | ref                        |          |
| Junior or High            | -                          | -        | 0.578 (0.205, 1.630)       | 0.300    |
| College or Others         | -                          | -        | 0.526 (0.186, 1.481)       | 0.224    |
| Not disclosed             | -                          | -        | 0.078 (0.018, 0.338)       | 0.001    |
| Occupation                |                            |          |                            |          |
| Unskilled work            | ref                        |          | -                          | -        |
| Skilled/Professional work | 1.884 (1.205, 2.944)       | 0.005    | -                          | -        |
| Students                  | 1.220 (0.736, 2.023)       | 0.441    | -                          | -        |
| Unemployment              | 0.846 (0.512, 1.396)       | 0.512    | -                          | -        |
| Not disclosed             | 1.026 (0.755, 1.395)       | 0.870    | -                          | -        |
| Genotypes                 |                            |          |                            |          |
| B                         | 0.067 (0.021, 0.214)       | <0.001   | -                          | -        |
| CRF01_AE                  | ref                        |          | -                          | -        |
| CRF07_BC                  | 24.637 (18.493, 32.822)    | <0.001   | ref                        |          |
| CRF55_01B                 | 24.965 (16.621, 37.497)    | <0.001   | 0.008 (0.004, 0.017)       | <0.001   |

**Table S3 Comparison of HIV-1 Transmission Growth Index according to HIV-1 Genotypes among MSM**

| HIV-1 Genotype | HIV-1 Transmission Growth Index |                   |           | <i>H, P value*</i>             |
|----------------|---------------------------------|-------------------|-----------|--------------------------------|
|                | No. analyzed (%)                | Median (quartile) | Mean rank |                                |
| Subtype B      | 123 (6.38)                      | 0.00 (0.00, 0.50) | 351.07    |                                |
| CRF01_AE       | 714 (37.05)                     | 0.58 (0.00, 1.70) | 537.20    | <i>H</i> = 1164.92, <i>P</i> < |
| CRF07_BC       | 782 (40.58)                     | 5.80 (5.34, 6.17) | 1441.81   | 0.01                           |
| CRF55_01B      | 308 (15.98)                     | 3.38 (2.83, 3.85) | 985.03    |                                |
| Total          | 1927 (100.00)                   | 3.02 (0.00, 5.62) | -         |                                |

Cluster growth was measured by calculating the number of newly diagnosed cases linked in a cluster in the previous 12 months divided by the square root of the cluster size. \* Kruskal-Wallis test. (Post-hoc test by Bonferroni)
